# Supplementary material for: Single-cell transcriptomics of the naked mole-rat reveals unexpected features of mammalian immunity
Source: PLoS Biol. 2019 Nov 21;17(11):e3000528. doi: 10.1371/journal.pbio.3000528 (PMC6894886; doi:10.1371/journal.pbio.3000528)
Supplement: S10 Table — For each marker gene in each of the converged clusters of the NM-R circulating immune scRNA-seq data, provided are its RefSeq gene ID, gene symbol, and converged cluster and cell type. NM-R, naked mole-rat; scRNA-seq, single-cell RNA-sequencing. (CSV) [file pbio.3000528.s022.csv]

gene_id	symbol	converged.cluster	converged.cell.type
101723625	Cd74	1	B-cell
101706353	LOC101706353	1	B-cell
101712580	LOC101712580	8	Plasma-cell
101718346	LOC101718346	1	B-cell
101703821	LOC101703821	5	Monocyte
101697345	LOC101697345	5	Monocyte
101712603	Cd79b	1	B-cell
101704667	LOC101704667	5	Monocyte
101725058	Cd79a	1	B-cell
101702405	Ptma	13	Unassigned.3
101716753	LOC101716753	1	B-cell
101716772	Rpl26	13	Unassigned.3
101697243	Rpl12	4	T-cell
101704989	LOC101704989	8	Plasma-cell
101697086	Rpl13a	4	T-cell
100913080	Rpl37a	4	T-cell
101716860	Rpl18a	13	Unassigned.3
101720109	LOC101720109	4	T-cell
101716335	Mef2c	1	B-cell
101719747	Ifi30	5	Monocyte
101700274	LOC101700274	5	Monocyte
101712340	LOC101712340	8	Plasma-cell
101701356	LOC101701356	5	Monocyte
101705375	LOC101705375	1	B-cell
101700523	Tnfrsf13c	1	B-cell
101706300	Gm2a	1	B-cell
101701225	Vpreb3	1	B-cell
101724318	Cd72	13	Unassigned.3
106008447	LOC106008447	1	B-cell
101708030	Rbm38	13	Unassigned.3
101697416	Cd22	1	B-cell
101712383	Id3	13	Unassigned.3
101718254	LOC101718254	8	Plasma-cell
101705990	Irf8	1	B-cell
101713200	LOC101713200	8	Plasma-cell
101718093	Acp5	1	B-cell
101711558	Fam129c	1	B-cell
101726358	Ccdc42b	1	B-cell
101725091	Aqp7	13	Unassigned.3
101706816	Fcmr	9	Dendritic-cell
101700582	Ctsh	5	Monocyte
101702393	Fcrla	1	B-cell
101714670	Cd19	1	B-cell
101700511	Chchd10	1	B-cell
101698344	Bank1	1	B-cell
101696484	Lmbrd1	9	Dendritic-cell
101710181	Oaz1	11	Unassigned.2
101710411	Tmsb10	6	Mast-cell
101706010	LOC101706010	9	Dendritic-cell
101703614	Glod5	2	Erythroid-cell
101709256	Nfkbia	9	Dendritic-cell
101701951	Siglec10	13	Unassigned.3
101720984	Phactr1	13	Unassigned.3
101715008	Plekho1	1	B-cell
101722097	Eaf2	8	Plasma-cell
101720508	Mzb1	8	Plasma-cell
101717727	Ets1	6	Mast-cell
101708448	LOC101708448	11	Unassigned.2
101704138	Il4r	13	Unassigned.3
101720560	S100a4	5	Monocyte
101701077	Cdc25b	13	Unassigned.3
101708052	Smap1	13	Unassigned.3
101717959	Dnajb2	11	Unassigned.2
101717601	Arl4a	2	Erythroid-cell
101722702	Prkcb	13	Unassigned.3
101726428	Bscl2	8	Plasma-cell
101698840	LOC101698840	9	Dendritic-cell
101720717	Pik3ap1	13	Unassigned.3
101712490	Tubb4b	11	Unassigned.2
101709836	LOC101709836	5	Monocyte
101709255	Itm2a	5	Monocyte
101707401	LOC101707401	6	Mast-cell
101699171	Cstb	11	Unassigned.2
101721791	Fchsd2	13	Unassigned.3
101700231	Psmd3	4	T-cell
101719839	Nek6	11	Unassigned.2
101715086	LOC101715086	13	Unassigned.3
101721124	Pabpc1	11	Unassigned.2
101696473	Dynll1	5	Monocyte
101699901	Rgs2	3	Neutrophil
101702895	Tp53inp1	8	Plasma-cell
101696396	LOC101696396	11	Unassigned.2
101712905	Zfp36l1	9	Dendritic-cell
101703695	Bin2	11	Unassigned.2
101726671	Rap1b	11	Unassigned.2
101711988	Taf1c	13	Unassigned.3
101700652	LOC101700652	6	Mast-cell
101705396	Mid1ip1	10	Ltf-high-neutrophil
101722861	Aes	11	Unassigned.2
101701239	Srebf2	13	Unassigned.3
101716941	Ltb	6	Mast-cell
101719156	Fam212a	11	Unassigned.2
101717911	Zg16	9	Dendritic-cell
101699840	Klf2	8	Plasma-cell
101700927	Fermt3	11	Unassigned.2
101711031	Tmem126b	12	CD8-T-cell
101705583	Samd15	8	Plasma-cell
101723401	Sla	11	Unassigned.2
101702727	Tmem52	5	Monocyte
101712445	Rrbp1	8	Plasma-cell
101700202	Celf2	9	Dendritic-cell
101714374	Sptbn1	8	Plasma-cell
101706612	Napsa	5	Monocyte
101718964	Vim	5	Monocyte
101720265	Tuba4a	11	Unassigned.2
101702279	Rgs18	11	Unassigned.2
101707906	Fabp5	6	Mast-cell
101706820	Anxa1	10	Ltf-high-neutrophil
101725320	Litaf	9	Dendritic-cell
101717429	Tln1	11	Unassigned.2
101705873	LOC101705873	4	T-cell
101706671	Knop1	12	CD8-T-cell
101723214	Trim28	13	Unassigned.3
101713080	Tspo	3	Neutrophil
101711137	Hmgxb4	13	Unassigned.3
101717769	Jchain	8	Plasma-cell
101703172	LOC101703172	11	Unassigned.2
101714267	Ppa1	12	CD8-T-cell
101722781	E2f6	11	Unassigned.2
101715346	F13a1	5	Monocyte
101714332	Itga2b	11	Unassigned.2
101710312	Snrnp70	8	Plasma-cell
101717112	Anxa5	11	Unassigned.2
101716686	Gpcpd1	9	Dendritic-cell
101699320	LOC101699320	5	Monocyte
101717475	Stk24	11	Unassigned.2
101714601	Pabpn1	13	Unassigned.3
101711804	LOC101711804	8	Plasma-cell
101721549	Rsu1	11	Unassigned.2
101702935	Bcl2a1	3	Neutrophil
101712867	Casp3	11	Unassigned.2
101719672	Mettl23	8	Plasma-cell
101711802	Sf1	13	Unassigned.3
106009289	LOC106009289	13	Unassigned.3
106007697	LOC106007697	12	CD8-T-cell
101713117	4-Sep	11	Unassigned.2
101719634	Kiaa1109	8	Plasma-cell
101702336	Eps15l1	13	Unassigned.3
101714600	LOC101714600	6	Mast-cell
101708544	F2r	11	Unassigned.2
101704581	LOC101704581	2	Erythroid-cell
101717182	Txn	10	Ltf-high-neutrophil
101724783	Mbd4	8	Plasma-cell
101708137	R3hcc1l	11	Unassigned.2
101720097	Prpf38b	8	Plasma-cell
101707522	Tyrobp	3	Neutrophil
101713318	Atxn7l3b	6	Mast-cell
101698959	Ppp3ca	10	Ltf-high-neutrophil
101717639	Tlr1	9	Dendritic-cell
101709878	Lmnb1	3	Neutrophil
101719847	S100a8	10	Ltf-high-neutrophil
101708868	Hmox1	5	Monocyte
101700479	LOC101700479	3	Neutrophil
101725077	LOC101725077	12	CD8-T-cell
101720531	Cdkn2d	11	Unassigned.2
101710909	Gadd45b	9	Dendritic-cell
101698954	Mdfic	13	Unassigned.3
101703514	LOC101703514	11	Unassigned.2
101712046	Sema4d	5	Monocyte
101702642	Blcap	11	Unassigned.2
101720959	Fam133b	9	Dendritic-cell
101716630	LOC101716630	8	Plasma-cell
101721730	Ogt	6	Mast-cell
101724499	Gtf2ird1	10	Ltf-high-neutrophil
106007577	LOC106007577	10	Ltf-high-neutrophil
101710608	Lamp2	5	Monocyte
101705628	Midn	6	Mast-cell
101711599	Tpst1	3	Neutrophil
101717033	LOC101717033	11	Unassigned.2
101704179	Fcgr2b	5	Monocyte
101719297	Adck5	11	Unassigned.2
101717966	Bhlhe41	8	Plasma-cell
101697902	Hcfc1	6	Mast-cell
101714164	Sod2	3	Neutrophil
101699369	Pccb	11	Unassigned.2
101713123	Sorl1	7	Unassigned.1
101717087	Cks1b	11	Unassigned.2
101722802	Lrrc25	3	Neutrophil
101700358	Unc13d	11	Unassigned.2
101711875	Slmap	11	Unassigned.2
101721683	Slc38a2	9	Dendritic-cell
101710244	Slc46a3	5	Monocyte
101699903	Oas1	5	Monocyte
101704925	Il6r	5	Monocyte
101719793	Ifrd1	11	Unassigned.2
101702024	Mapre3	11	Unassigned.2
101706859	Bpgm	2	Erythroid-cell
101708906	Adrbk1	6	Mast-cell
101701899	Slpi	3	Neutrophil
101713450	Ranbp9	5	Monocyte
101714110	Man1a1	5	Monocyte
101699592	Alas2	2	Erythroid-cell
101717737	Actr6	11	Unassigned.2
101710555	Letm1	5	Monocyte
101705176	Cttn	11	Unassigned.2
101719048	Csgalnact2	5	Monocyte
101722147	Ly96	3	Neutrophil
101718383	Fos	5	Monocyte
101715135	Dok3	10	Ltf-high-neutrophil
101723404	LOC101723404	11	Unassigned.2
101709405	Pfkp	11	Unassigned.2
101720089	Pmvk	9	Dendritic-cell
101719404	Setd2	6	Mast-cell
101721890	Galc	5	Monocyte
101712605	Marcks	5	Monocyte
101696292	N4bp2l1	5	Monocyte
101708117	Sgk1	5	Monocyte
101715738	Smc4	7	Unassigned.1
101725452	Abcc1	6	Mast-cell
101703975	Dhcr24	6	Mast-cell
101698969	LOC101698969	6	Mast-cell
101716782	Fmnl1	6	Mast-cell
101697558	Sun1	6	Mast-cell
101696428	LOC101696428	2	Erythroid-cell
101717834	Samd9	5	Monocyte
101725715	Dync1h1	6	Mast-cell
101701791	Glrx	10	Ltf-high-neutrophil
101717113	Maml3	6	Mast-cell
101714991	Cks2	10	Ltf-high-neutrophil
101711706	LOC101711706	13	Unassigned.3
101725655	Asb1	6	Mast-cell
101708839	Dnajc1	6	Mast-cell
101704280	Znf292	9	Dendritic-cell
101715955	Zmynd11	13	Unassigned.3
101700812	Rbpms2	11	Unassigned.2
101716356	LOC101716356	11	Unassigned.2
101706095	Cd55	11	Unassigned.2
101701370	Usp9x	5	Monocyte
101705091	Pip4k2a	13	Unassigned.3
101705863	Prkab1	11	Unassigned.2
101713152	Dnm1l	11	Unassigned.2
101705475	Lmo4	6	Mast-cell
101715459	Arid1a	6	Mast-cell
101707285	Qpct	5	Monocyte
101701245	Slc29a1	6	Mast-cell
101700910	Clec4e	3	Neutrophil
101719372	Gk	7	Unassigned.1
101697227	Gprc5a	11	Unassigned.2
101719832	Atg4b	13	Unassigned.3
101696710	Appl2	11	Unassigned.2
101703538	Ap1s1	11	Unassigned.2
101723063	Ezh1	6	Mast-cell
101708428	Meis1	11	Unassigned.2
101726102	Rnd1	3	Neutrophil
101702004	Flna	5	Monocyte
101721004	Klf10	6	Mast-cell
101726615	Dcaf6	11	Unassigned.2
101713323	Ap3d1	5	Monocyte
101703058	Arf6	8	Plasma-cell
101705482	Pofut2	11	Unassigned.2
101700210	Alox5	6	Mast-cell
101721932	Myo1f	5	Monocyte
101714563	Hnrnpab	6	Mast-cell
101704567	Lmna	11	Unassigned.2
101723154	Lyz	5	Monocyte
101708924	LOC101708924	10	Ltf-high-neutrophil
101711038	LOC101711038	10	Ltf-high-neutrophil
101698769	Camp	10	Ltf-high-neutrophil
101724655	Fcn1	10	Ltf-high-neutrophil
101719771	LOC101719771	10	Ltf-high-neutrophil
101722340	Ltf	10	Ltf-high-neutrophil
101705743	Hp	10	Ltf-high-neutrophil
101722627	LOC101722627	10	Ltf-high-neutrophil
101719616	Plac8	10	Ltf-high-neutrophil
101702022	Fcer1g	3	Neutrophil
101724213	LOC101724213	3	Neutrophil
101725559	Csta	10	Ltf-high-neutrophil
101704080	Retn	10	Ltf-high-neutrophil
106007543	LOC106007543	10	Ltf-high-neutrophil
101708758	Siglec5	3	Neutrophil
101706689	Wfdc2	10	Ltf-high-neutrophil
101725830	LOC101725830	3	Neutrophil
101710536	Il1r2	10	Ltf-high-neutrophil
101719243	Spink2	3	Neutrophil
101723047	Cebpd	3	Neutrophil
101724995	Hemgn	10	Ltf-high-neutrophil
101721231	Plbd1	10	Ltf-high-neutrophil
101724230	Cfp	10	Ltf-high-neutrophil
101726001	Lrg1	3	Neutrophil
101708523	LOC101708523	10	Ltf-high-neutrophil
101707455	Fpr1	10	Ltf-high-neutrophil
101702131	Upp1	10	Ltf-high-neutrophil
101717462	Pycard	6	Mast-cell
101716513	Gyg1	10	Ltf-high-neutrophil
101705673	Slc40a1	10	Ltf-high-neutrophil
101708071	Id2	6	Mast-cell
101716979	Ctsd	11	Unassigned.2
101726398	Orm1	10	Ltf-high-neutrophil
101715514	Krt23	10	Ltf-high-neutrophil
101704996	Olfm4	10	Ltf-high-neutrophil
101712235	Cxcr1	3	Neutrophil
106007830	Cfd	3	Neutrophil
101702781	P2ry13	5	Monocyte
101702345	Lgals3	6	Mast-cell
101703445	Chi3l1	10	Ltf-high-neutrophil
101709497	Bnip3l	2	Erythroid-cell
101708852	Cd14	3	Neutrophil
101697726	Lbp	7	Unassigned.1
101712992	Gpr84	3	Neutrophil
101717850	Stx11	11	Unassigned.2
106007553	LOC106007553	10	Ltf-high-neutrophil
106010651	LOC106010651	3	Neutrophil
101718427	Mkl1	10	Ltf-high-neutrophil
101704768	LOC101704768	10	Ltf-high-neutrophil
101713941	LOC101713941	10	Ltf-high-neutrophil
101718754	Mafg	10	Ltf-high-neutrophil
101718107	Clu	5	Monocyte
101704516	Steap4	3	Neutrophil
101717047	Gp1bb	11	Unassigned.2
101723250	Ascl2	3	Neutrophil
101698039	Cebpb	3	Neutrophil
101700638	Pglyrp1	10	Ltf-high-neutrophil
101724572	LOC101724572	7	Unassigned.1
101713928	Aif1	5	Monocyte
101717320	Tnni2	6	Mast-cell
101726208	LOC101726208	12	CD8-T-cell
101708770	LOC101708770	3	Neutrophil
101698936	Kiaa0513	7	Unassigned.1
101716487	Myl9	11	Unassigned.2
101703770	Nsmce1	11	Unassigned.2
101696452	Cd300lf	3	Neutrophil
101712956	C5ar2	9	Dendritic-cell
101717162	Igfbp2	11	Unassigned.2
101719121	Lgals1	6	Mast-cell
106007524	Mapk14	6	Mast-cell
101697888	LOC101697888	5	Monocyte
101704901	Rab44	6	Mast-cell
101705534	Plek	11	Unassigned.2
101712062	Nfe2	11	Unassigned.2
101720294	Tnfsf8	5	Monocyte
101712534	Cd3d	4	T-cell
101710264	Filip1l	3	Neutrophil
101711394	Aifm2	3	Neutrophil
101703275	Glul	5	Monocyte
101715424	LOC101715424	6	Mast-cell
101698766	Opa1	11	Unassigned.2
101724766	Phf3	13	Unassigned.3
101718787	Egln3	11	Unassigned.2
101717529	Sftpd	6	Mast-cell
106010650	LOC106010650	6	Mast-cell
101704309	Il1b	3	Neutrophil
101707470	Igf2r	5	Monocyte
101709871	Cnfn	5	Monocyte
101700630	Fcgr2a	3	Neutrophil
101724026	Cd300a	3	Neutrophil
101713410	Bcl2l1	11	Unassigned.2
101698597	Flt3lg	13	Unassigned.3
101711289	Nkg7	12	CD8-T-cell
101723043	Mgat4b	6	Mast-cell
101709350	Erbb2ip	11	Unassigned.2
101709826	LOC101709826	5	Monocyte
101703174	Bcl7c	6	Mast-cell
101698401	Nsd1	5	Monocyte
101722915	Ccrl2	9	Dendritic-cell
101709624	Tmem140	11	Unassigned.2
101721082	Gng11	6	Mast-cell
101720054	2-Mar	11	Unassigned.2
101698820	Rgcc	7	Unassigned.1
101709223	LOC101709223	4	T-cell
101713038	LOC101713038	7	Unassigned.1
101710754	Tmcc2	2	Erythroid-cell
101721110	Saraf	11	Unassigned.2
101711829	Fam168b	6	Mast-cell
101717297	Efhc1	3	Neutrophil
101707267	Nipal4	7	Unassigned.1
101711593	Capn12	8	Plasma-cell
106008480	LOC106008480	3	Neutrophil
101708518	Clec7a	9	Dendritic-cell
101716588	Ankrd54	11	Unassigned.2
101719115	Fhl2	11	Unassigned.2
101700499	Crem	5	Monocyte
101712197	Cd3g	4	T-cell
101714803	Npb	11	Unassigned.2
101712207	Pdlim1	11	Unassigned.2
101719402	Nrgn	11	Unassigned.2
101718163	Rgs10	11	Unassigned.2
101706349	LOC101706349	11	Unassigned.2
101697287	Gp9	11	Unassigned.2
101703578	Ddah2	11	Unassigned.2
101709232	LOC101709232	11	Unassigned.2
101717206	Apoe	11	Unassigned.2
101699711	Tmem40	11	Unassigned.2
101705762	Ly6g6f	11	Unassigned.2
101720612	Tubb1	11	Unassigned.2
101724369	Ube2c	11	Unassigned.2
101707899	Smox	11	Unassigned.2
101709970	Lmo2	11	Unassigned.2
101715362	Ptn	11	Unassigned.2
101717411	Treml1	11	Unassigned.2
101705243	Rcan1	11	Unassigned.2
101700280	Fto	11	Unassigned.2
101721271	Tm4sf1	11	Unassigned.2
101705143	Ly6g6d	11	Unassigned.2
101726463	Srxn1	11	Unassigned.2
101702123	Alox12	11	Unassigned.2
101713536	F11r	11	Unassigned.2
101724524	Tubb4a	11	Unassigned.2
101716692	Btg3	11	Unassigned.2
101713103	Hecw2	11	Unassigned.2
101726249	Arhgap18	11	Unassigned.2
101708095	Gata1	11	Unassigned.2
101704539	LOC101704539	11	Unassigned.2
101718674	Scara3	11	Unassigned.2
101697690	LOC101697690	11	Unassigned.2
101702547	Stmn1	11	Unassigned.2
101704906	Sntg2	11	Unassigned.2
101712307	Ift43	11	Unassigned.2
101722310	Elp3	11	Unassigned.2
101718658	Angptl4	11	Unassigned.2
101722824	Ppp1r14c	11	Unassigned.2
101723364	Penk	11	Unassigned.2
101714089	Myct1	11	Unassigned.2
101722497	Slc16a7	11	Unassigned.2
101716029	Chac2	8	Plasma-cell
101724985	Smtn	11	Unassigned.2
101723233	Sohlh1	11	Unassigned.2
101703021	Gfi1b	11	Unassigned.2
101719480	Gabbr1	11	Unassigned.2
101717774	Apoc1	11	Unassigned.2
101701802	Gas2l1	11	Unassigned.2
101712353	Jsrp1	11	Unassigned.2
101724179	Comtd1	11	Unassigned.2
101716748	Dennd2c	11	Unassigned.2
101723049	Snx21	11	Unassigned.2
101709939	Tmbim1	11	Unassigned.2
101726090	Igf2bp3	11	Unassigned.2
101700697	LOC101700697	11	Unassigned.2
101715407	Kel	2	Erythroid-cell
101720065	Bphl	11	Unassigned.2
101725741	Rab37	11	Unassigned.2
101705915	LOC101705915	11	Unassigned.2
101716319	Ak3	11	Unassigned.2
101700637	LOC101700637	8	Plasma-cell
101713426	Tppp3	8	Plasma-cell
101719238	Inpp4b	13	Unassigned.3
101709888	Galnt1	6	Mast-cell
101698177	Gbp6	5	Monocyte
101721546	Ptrf	6	Mast-cell
101726631	Gzma	12	CD8-T-cell
101711464	Cd3e	4	T-cell
101712103	LOC101712103	12	CD8-T-cell
101722238	Timp1	12	CD8-T-cell
101706894	Dapl1	12	CD8-T-cell
101712384	Ccl5	12	CD8-T-cell
101708790	Ctsw	12	CD8-T-cell
101703277	S100a10	5	Monocyte
101711364	LOC101711364	12	CD8-T-cell
101707104	Gzmk	12	CD8-T-cell
101709705	Tnfrsf25	12	CD8-T-cell
101699088	Ldhb	4	T-cell
101698767	Gata3	12	CD8-T-cell
101699770	LOC101699770	8	Plasma-cell
101713886	Cd244	5	Monocyte
101710427	11-Sep	5	Monocyte
101719030	LOC101719030	6	Mast-cell
101699126	Ocel1	6	Mast-cell
101707882	Tcf7	4	T-cell
101715439	Kazald1	7	Unassigned.1
101724611	Dcxr	5	Monocyte
101708017	Xdh	5	Monocyte
101721336	LOC101721336	7	Unassigned.1
101700961	Prex1	6	Mast-cell
101704043	Dhx8	8	Plasma-cell
101726334	Msl1	6	Mast-cell
101711984	Tiam1	13	Unassigned.3
101710985	Aff4	13	Unassigned.3
101704392	Ssh2	13	Unassigned.3
101707145	Cpd	9	Dendritic-cell
101704937	LOC101704937	2	Erythroid-cell
101723868	Ahsp	2	Erythroid-cell
101699543	Pvalb	2	Erythroid-cell
106009165	LOC106009165	2	Erythroid-cell
101718529	LOC101718529	2	Erythroid-cell
101705305	LOC101705305	2	Erythroid-cell
101697802	Ca2	2	Erythroid-cell
101725693	Dcun1d1	2	Erythroid-cell
101715397	LOC101715397	6	Mast-cell
101719082	Slc4a1	2	Erythroid-cell
101706236	Pim1	5	Monocyte
101715448	Sepp1	5	Monocyte
101722455	Fetub	3	Neutrophil
101698280	Adam10	5	Monocyte
106010108	LOC106010108	9	Dendritic-cell
101711680	LOC101711680	3	Neutrophil
101713558	LOC101713558	3	Neutrophil
101701618	LOC101701618	3	Neutrophil
101714481	Irg1	7	Unassigned.1
101706734	Hpgds	6	Mast-cell
101716824	Pla2g7	3	Neutrophil
101704157	Socs3	3	Neutrophil
101712837	LOC101712837	7	Unassigned.1
101710828	Arrdc4	6	Mast-cell
101703863	Mafb	5	Monocyte
101709998	Xpo6	7	Unassigned.1
101697815	Cdadc1	7	Unassigned.1
101720925	Nde1	7	Unassigned.1
101702581	Tgfbi	5	Monocyte
101711105	Slc8a1	5	Monocyte
101715138	Tnfaip2	5	Monocyte
101710943	LOC101710943	6	Mast-cell
101713119	Ccl14	6	Mast-cell
101702716	Ell2	8	Plasma-cell
101708582	LOC101708582	5	Monocyte
101707512	Irgm	5	Monocyte
101715798	Scarb2	5	Monocyte
101707880	Adam19	7	Unassigned.1
101714727	LOC101714727	5	Monocyte
101712133	Cd70	8	Plasma-cell
101714583	Id1	6	Mast-cell
101706720	Rnase6	5	Monocyte
101701190	Fcer1a	6	Mast-cell
101716375	Prrc2b	6	Mast-cell
101722051	Rps6ka3	6	Mast-cell
101709345	LOC101709345	6	Mast-cell
101703487	C1qa	5	Monocyte
101704347	C1qc	5	Monocyte
101704691	C1qb	5	Monocyte
101718570	Fn1	5	Monocyte
101710900	Gpbar1	5	Monocyte
101722087	LOC101722087	6	Mast-cell
101709291	Edem1	8	Plasma-cell
101712997	LOC101712997	6	Mast-cell
101715950	Cpa3	6	Mast-cell
101724855	Gcsaml	6	Mast-cell
101723260	Espl1	6	Mast-cell
101703025	Ms4a2	6	Mast-cell
101725560	LOC101725560	6	Mast-cell
101714023	LOC101714023	6	Mast-cell
101706035	Anpep	6	Mast-cell
101708655	Prg3	6	Mast-cell
101717323	LOC101717323	8	Plasma-cell
