# Supplementary material for: Single-cell transcriptomics of the naked mole-rat reveals unexpected features of mammalian immunity
Source: PLoS Biol. 2019 Nov 21;17(11):e3000528. doi: 10.1371/journal.pbio.3000528 (PMC6894886; doi:10.1371/journal.pbio.3000528)
Supplement: S11 Table — For each species, for each gene (protein coding, annotated, and putative pseudogenes) provided are the gene ID (Ensembl for all species except NM-R, for which it is RefSeq), gene symbol, gene biotype, genome scaffold name, start site, end site, and gene family. LRC, leukocyte receptor complex; MHC-I, major histocompatibility complex class I; NKC, natural killer cell receptor complex; NM-R, naked mole-rat. (CSV) [file pbio.3000528.s023.csv]

species	gene_id	symbol	biotype	seqnames	start	end	gene.family
human	ENSG00000170889	RPS9	Protein Coding	chr19	54200742	54249003	LRC.SYNTENY
human	ENSG00000204577	LILRB3	Protein Coding	chr19	54216278	54223506	LILR
human	ENSG00000244482	LILRA6	Protein Coding	chr19	54236592	54242791	LILR
human	ENSG00000105609	LILRB5	Protein Coding	chr19	54249431	54257301	LILR
human	ENSG00000131042	LILRB2	Protein Coding	chr19	54273821	54281184	LILR
human	ENSG00000187116	LILRA5	Protein Coding	chr19	54307070	54313139	LILR
human	ENSG00000239961	LILRA4	Protein Coding	chr19	54333185	54339150	LILR
human	ENSG00000239998	LILRA2	Protein Coding	chr19	54572920	54590287	LILR
human	ENSG00000104974	LILRA1	Protein Coding	chr19	54573879	54602090	LILR
human	ENSG00000104972	LILRB1	Protein Coding	chr19	54617158	54637528	LILR
human	ENSG00000186818	LILRB4	Protein Coding	chr19	54643889	54670359	LILR
human	ENSG00000186152	LILRP1	Annotated Pseudogene	chr19	54696604	54700905	LILR
human	ENSG00000170858	LILRP2	Annotated Pseudogene	chr19	54707916	54713453	LILR
human	ENSG00000284511	KIR2DS2	Protein Coding	chr19	26124	39942	KIR
human	ENSG00000284089	KIR2DL5B	Protein Coding	chr19	58796	67805	KIR
human	ENSG00000284039;ENSG00000283719	KIR2DS3/5	Protein Coding	chr19	148495	190684	KIR
human	ENSG00000283937	KIR2DS1	Protein Coding	chr19	163173	176998	KIR
human	ENSG00000125498;ENSG00000284016	KIR2DL1/KU645196.2	Protein Coding	chr19	177765	191731	KIR
human	ENSG00000274143	KIR2DL5A	Protein Coding	chr19	450950	460291	KIR
human	ENSG00000104970	KIR3DX1	Protein Coding	chr19	54532692	54545771	KIR
human	ENSG00000242019	KIR3DL3	Protein Coding	chr19	54724479	54736536	KIR
human	ENSG00000283716;ENSG00000243772	KIR2DL2/3	Protein Coding	chr19	54738515	54753052	KIR
human	ENSG00000242473	KIR2DP1	Annotated Pseudogene	chr19	54755023	54767371	KIR
human	ENSG00000189013	KIR2DL4	Protein Coding	chr19	54803535	54814517	KIR
human	ENSG00000167633;ENSG00000274283	KIR3DL/S1	Protein Coding	chr19	54816468	54866993	KIR
human	ENSG00000221957	KIR2DS4	Annotated Pseudogene	chr19	54832676	54848569	KIR
human	ENSG00000240403	KIR3DL2	Protein Coding	chr19	54850443	54867207	KIR
human	ENSG00000189430	NCR1	Protein Coding	chr19	54906150	54916140	LRC.SYNTENY
mouse	ENSMUSG00000006333	Rps9	Protein Coding	chr7	3703993	3706897	LRC.SYNTENY
mouse	ENSMUSG00000058818	Pirb	Protein Coding	chr7	3711409	3720391	LILR
mouse	ENSMUSG00000081665	Pira1	Annotated Pseudogene	chr7	3731630	3739889	LILR
mouse	ENSMUSG00000080917	ENSMUSG00000080917	Annotated Pseudogene	chr7	3788883	3799631	LILR
mouse	ENSMUSG00000074419	ENSMUSG00000074419	Protein Coding	chr7	3816781	3825687	LILR
mouse	ENSMUSG00000089942	Pira2	Protein Coding	chr7	3836812	3845051	LILR
mouse	ENSMUSG00000074417	ENSMUSG00000074417	Protein Coding	chr7	3884242	3898120	LILR
mouse	ENSMUSG00000030427	Lilra6	Protein Coding	chr7	3908280	3915503	LILR
mouse	ENSMUSG00000070873	Lilra5	Protein Coding	chr7	4237754	4243463	LILR
mouse	ENSMUSG00000062524	Ncr1	Protein Coding	chr7	4337724	4345164	LRC.SYNTENY
mouse	chr7_chr10		protein_coding	chr7_chr10	1	2	LRC.spacer
mouse	ENSMUSG00000062593	Lilrb4a	Protein Coding	chr10	51480612	51496613	LILR
mouse	ENSMUSG00000112023	Lilr4b	Protein Coding	chr10	51480632	51486703	LILR
mouse	ENSMUSG00000112148	Lilrb4a	Protein Coding	chr10	51490956	51496611	LILR
mouse	chr10_chrX		protein_coding	chr10_chrX	1	2	LRC.spacer
mouse	ENSMUSG00000057439	Kir3dl2	Protein Coding	chrX	136448107	136544056	KIR
mouse	ENSMUSG00000031424	Kir3dl1	Protein Coding	chrX	136517999	136534309	KIR
nmr	106007604	LOC106007604	Protein Coding	NW_004624832.1	2619152	2622227	LILR
nmr	101699320	LOC101699320	Protein Coding	NW_004624832.1	2616179	2619141	LILR
nmr	101722866	Rps9	Protein Coding	NW_004624832.1	2391268	2394196	LRC.SYNTENY
nmr	106007868	Lilrb2	Protein Coding	NW_004624832.1	2386326	2387010	LILR
nmr	ENSHGLG00000017713	Ncr1	Protein Coding	NW_004624832.1	2370494	2372004	LRC.SYNTENY
nmr	101722653	LOC101722653	Protein Coding	NW_004624832.1	2363363	2385286	LILR
nmr	101716592	LOC101716592	Protein Coding	NW_004624832.1	2214828	2246356	LILR
nmr	101720880	LOC101720880	Protein Coding	NW_004624832.1	2163051	2188843	LILR
human	ENSG00000139187	KLRG1	Protein Coding	chr12	8950044	9010760	NKC.SYNTENY
human	ENSG00000111796	KLRB1	Protein Coding	chr12	9594551	9607886	KLRB
human	ENSG00000150045	KLRF1	Protein Coding	chr12	9827481	9845007	KLRF
human	ENSG00000256797	KLRF2	Protein Coding	chr12	9881489	9895833	KLRF
human	ENSG00000134539	KLRD1	Protein Coding	chr12	10226058	10329600	KLRD
human	ENSG00000213809	KLRK1	Protein Coding	chr12	10372353	10391874	KLRK
human	ENSG00000255819	KLRC4-KLRK1	Protein Coding	chr12	10372353	10410146	KLRC
human	ENSG00000183542	KLRC4	Protein Coding	chr12	10407382	10409757	KLRC
human	ENSG00000205810	KLRC3	Protein Coding	chr12	10412312	10420595	KLRC
human	ENSG00000255641	RP11-277P12.6	Protein Coding	chr12	10412312	10436001	KLRC
human	ENSG00000205809	KLRC2	Protein Coding	chr12	10426854	10442300	KLRC
human	ENSG00000134545	KLRC1	Protein Coding	chr12	10442264	10454685	KLRC
human	ENSG00000256667	KLRA1P	Annotated Pseudogene	chr12	10588063	10599669	KLRA
human	ENSG00000060138	YBX3	Protein Coding	chr12	10699089	10723312	NKC.SYNTENY
mouse	ENSMUSG00000030114	Klrg1	Protein Coding	chr6	122270596	122282882	NKC.SYNTENY
mouse	ENSMUSG00000030361	Klrb1a	Protein Coding	chr6	128609227	128623533	KLRB
mouse	ENSMUSG00000079299	Klrb1	Protein Coding	chr6	128705836	128723059	KLRB
mouse	ENSMUSG00000030325	Klrb1c	Protein Coding	chr6	128778485	128789215	KLRB
mouse	ENSMUSG00000107872	ENSMUSG00000107872	Protein Coding	chr6	128780285	128826315	KLRB
mouse	ENSMUSG00000079298	Klrb1b	Protein Coding	chr6	128813706	128826331	KLRB
mouse	ENSMUSG00000030154	Klrb1f	Protein Coding	chr6	129045901	129057464	KLRB
mouse	ENSMUSG00000050241	Klre1	Protein Coding	chr6	129577905	129585827	KLRE
mouse	ENSMUSG00000030165	Klrd1	Protein Coding	chr6	129591782	129598775	KLRD
mouse	ENSMUSG00000030149	Klrk1	Protein Coding	chr6	129610323	129623864	KLRK
mouse	ENSMUSG00000033027	Klrc3	Protein Coding	chr6	129639064	129643337	KLRC
mouse	ENSMUSG00000052736	Klrc2	Protein Coding	chr6	129647496	129660689	KLRC
mouse	ENSMUSG00000030167	Klrc1	Protein Coding	chr6	129666015	129678973	KLRC
mouse	ENSMUSG00000067610	Klri1	Protein Coding	chr6	129697218	129717132	KLRI
mouse	ENSMUSG00000043932	Klri2	Protein Coding	chr6	129729041	129740484	KLRI
mouse	ENSMUSG00000071158	ENSMUSG00000071158	Protein Coding	chr6	129766568	129784270	KLRH
mouse	ENSMUSG00000014543	Klra17	Protein Coding	chr6	129831154	129876672	KLRA
mouse	ENSMUSG00000030173	Klra5	Protein Coding	chr6	129898996	129917650	KLRA
mouse	ENSMUSG00000061769	Klra6	Protein Coding	chr6	130013033	130026954	KLRA
mouse	ENSMUSG00000079852	Klra4	Protein Coding	chr6	130043731	130067271	KLRA
mouse	ENSMUSG00000089727	Klra8	Protein Coding	chr6	130115226	130129898	KLRA
mouse	ENSMUSG00000033024	Klra9	Protein Coding	chr6	130178675	130193112	KLRA
mouse	ENSMUSG00000067599	Klra7	Protein Coding	chr6	130218605	130233322	KLRA
mouse	ENSMUSG00000072718	Klra10	Protein Coding	chr6	130269194	130281928	KLRA
mouse	ENSMUSG00000067591	Klra3	Protein Coding	chr6	130323289	130337574	KLRA
mouse	ENSMUSG00000079853	Klra1	Protein Coding	chr6	130363917	130386874	KLRA
mouse	ENSMUSG00000084204	ENSMUSG00000084204	Annotated Pseudogene	chr6	130398272	130407935	KLRA
mouse	ENSMUSG00000030187	Klra2	Protein Coding	chr6	131219223	131247362	KLRA
mouse	ENSMUSG00000030189	Ybx3	Protein Coding	chr6	131364855	131388476	NKC.SYNTENY
nmr	101722776	Klrg1	Protein Coding	NW_004624860.1	4687306	4695633	NKC.SYNTENY
nmr	NW_004624860.1_NW_004624752.1		protein_coding	NW_004624860.1_NW_004624752.1	1	2	NKC.spacer
nmr	101714720	Ybx3	Protein Coding	NW_004624752.1	27354811	27368556	NKC.SYNTENY
nmr	101714034	LOC101714034	Protein Coding	NW_004624752.1	27253238	27272633	KLRA
nmr	101713681	LOC101713681	Protein Coding	NW_004624752.1	27152550	27156788	KLRC
nmr	101713324	Klrk1	Protein Coding	NW_004624752.1	27064952	27075930	KLRK
nmr	101711887	Klrd1	Protein Coding	NW_004624752.1	27010031	27037005	KLRD
nmr	NW_004624752.1_NW_004624826.1		protein_coding	NW_004624752.1_NW_004624826.1	1	2	NKC.spacer
nmr	101715335	LOC101715335	Protein Coding	NW_004624826.1	5911291	5914328	KLRE
human	ENSG00000204644	ZFP57	Protein Coding	chr6	29672392	29681110	MHC.SYNTENY
human	ENSG00000204642	HLA-F	Protein Coding	chr6	29722775	29738528	MHC
human	ENSG00000204632	HLA-G	Protein Coding	chr6	29826967	29831125	MHC
human	ENSG00000206341	HLA-H	Annotated Pseudogene	chr6	29887752	29890482	MHC
human	ENSG00000231130	HLA-T	Annotated Pseudogene	chr6	29896654	29897786	MHC
human	ENSG00000230795	HLA-K	Annotated Pseudogene	chr6	29926459	29929232	MHC
human	ENSG00000206503	HLA-A	Protein Coding	chr6	29941260	29945884	MHC
human	ENSG00000235290	HLA-W	Annotated Pseudogene	chr6	29956596	29958570	MHC
human	ENSG00000204622	HLA-J	Annotated Pseudogene	chr6	30005971	30009956	MHC
human	ENSG00000243753	HLA-L	Annotated Pseudogene	chr6	30259584	30293014	MHC
human	ENSG00000224372	HLA-N	Annotated Pseudogene	chr6	30351416	30351550	MHC
human	ENSG00000204592	HLA-E	Protein Coding	chr6	30489467	30494205	MHC
human	ENSG00000204525	HLA-C	Protein Coding	chr6	31268749	31272130	MHC
human	ENSG00000234745	HLA-B	Protein Coding	chr6	31353872	31357188	MHC
human	ENSG00000204498	NFKBIL1	Protein Coding	chr6	31546870	31558829	MHC.SYNTENY
mouse	ENSMUSG00000016283	H2-M2	Protein Coding	chr17	37480851	37483552	MHC
mouse	ENSMUSG00000016206	H2-M3	Protein Coding	chr17	37270220	37274484	MHC
mouse	ENSMUSG00000036036	Zfp57	Protein Coding	chr17	37001163	37010635	MHC.SYNTENY
mouse	ENSMUSG00000024459	H2-M5	Protein Coding	chr17	36984061	36989537	MHC
mouse	ENSMUSG00000064308	2410137M14Rik	Protein Coding	chr17	36977701	36981237	MHC
mouse	ENSMUSG00000083534	H2-M6-ps	Annotated Pseudogene	chr17	36969195	36971396	MHC
mouse	ENSMUSG00000037130	H2-M10.6	Protein Coding	chr17	36812171	36815564	MHC
mouse	ENSMUSG00000037246	H2-M10.5	Protein Coding	chr17	36772910	36776234	MHC
mouse	ENSMUSG00000092521	ENSMUSG00000092521	Annotated Pseudogene	chr17	36732642	36734751	MHC
mouse	ENSMUSG00000067201	H2-M9	Protein Coding	chr17	36639285	36642666	MHC
mouse	ENSMUSG00000092265	ENSMUSG00000092265	Annotated Pseudogene	chr17	36210276	36211184	MHC
mouse	ENSMUSG00000092457	ENSMUSG00000092457	Annotated Pseudogene	chr17	36201996	36206339	MHC
mouse	ENSMUSG00000092306	ENSMUSG00000092306	Annotated Pseudogene	chr17	36197570	36198513	MHC
mouse	ENSMUSG00000073402	ENSMUSG00000073402	Protein Coding	chr17	36164443	36168537	MHC
mouse	ENSMUSG00000092366	ENSMUSG00000092366	Annotated Pseudogene	chr17	36156531	36162079	MHC
mouse	ENSMUSG00000073403	ENSMUSG00000073403	Annotated Pseudogene	chr17	36141758	36145923	MHC
mouse	ENSMUSG00000073980	ENSMUSG00000073980	Annotated Pseudogene	chr17	36137188	36139105	MHC
mouse	ENSMUSG00000079491	H2-T10	Annotated Pseudogene	chr17	36115876	36121465	MHC
mouse	ENSMUSG00000092243	ENSMUSG00000092243	Protein Coding	chr17	36109719	36129425	MHC
mouse	ENSMUSG00000073405	H2-T-ps	Annotated Pseudogene	chr17	36109234	36111658	MHC
mouse	ENSMUSG00000092224	ENSMUSG00000092224	Annotated Pseudogene	chr17	36094968	36096805	MHC
mouse	ENSMUSG00000073406	H2-Bl	Annotated Pseudogene	chr17	36080115	36084223	MHC
mouse	ENSMUSG00000079492	ENSMUSG00000079492	Protein Coding	chr17	36055816	36058371	MHC
mouse	ENSMUSG00000056116	H2-T22	Protein Coding	chr17	36037128	36042747	MHC
mouse	ENSMUSG00000067212	H2-T23	Protein Coding	chr17	36029773	36032855	MHC
mouse	ENSMUSG00000053835	H2-T24	Protein Coding	chr17	36005695	36020560	MHC
mouse	ENSMUSG00000067235	H2-Q10	Protein Coding	chr17	35470089	35474563	MHC
mouse	ENSMUSG00000060550	H2-Q7	Protein Coding	chr17	35439155	35443773	MHC
mouse	ENSMUSG00000073409	H2-Q6	Protein Coding	chr17	35424850	35430055	MHC
mouse	ENSMUSG00000055413	H2-Q5	Annotated Pseudogene	chr17	35394126	35397800	MHC
mouse	ENSMUSG00000035929	H2-Q4	Protein Coding	chr17	35379617	35385290	MHC
mouse	ENSMUSG00000091705	H2-Q2	Protein Coding	chr17	35342242	35346762	MHC
mouse	ENSMUSG00000079507	H2-Q1	Protein Coding	chr17	35320405	35325099	MHC
mouse	14980	H2-L	Protein Coding	chr17	35263123	35266730	MHC
mouse	ENSMUSG00000073411	H2-D1	Protein Coding	chr17	35262730	35267499	MHC
mouse	ENSMUSG00000042419	Nfkbil1	Protein Coding	chr17	35220175	35235792	MHC.SYNTENY
mouse	ENSMUSG00000061232	H2-K1	Protein Coding	chr17	33996017	34000333	MHC
mouse	ENSMUSG00000067203	H2-K2	Annotated Pseudogene	chr17	33974831	33978790	MHC
nmr	101719128	Zfp57	Protein Coding	NW_004624754.1	25392666	25397060	MHC.SYNTENY
nmr	106009518	LOC106009518	Annotated Pseudogene	NW_004624754.1	25171461	25174662	MHC
nmr	101721938	LOC101721938	Protein Coding	NW_004624754.1	24729413	24730041	MHC
nmr	101721592	LOC101721592	Protein Coding	NW_004624754.1	24679872	24683547	MHC
nmr	101719126	Nfkbil1	Protein Coding	NW_004624754.1	24641157	24652089	MHC.SYNTENY
